# Supplementary material for: Common Themes in Zoonotic Spillover and Disease Emergence: Lessons Learned from Bat- and Rodent-Borne RNA Viruses
Source: MDPI journal article supplement (doi:10.3390/v13081509), 2021-07-31
Supplement: s1 [file s1]

**Supplementary Table S1.** Examples of Outbreaks in Human Populations by RNA Viruses Harbored by Rodents

| <b>Virus<br/>Common Name</b>          | <b>Virus<br/>Species Name (ICTV)</b>                                | <b>Family</b>       | <b>Notable outbreaks</b>                  | <b>Reservoir</b>                   | <b>Citations</b> |
|---------------------------------------|---------------------------------------------------------------------|---------------------|-------------------------------------------|------------------------------------|------------------|
| Chapare Virus                         | <i>Chapare mammarenavirus</i>                                       | <i>Arenaviridae</i> | 2003-2004; 2019<br>Bolivia                | Unknown                            | [286,287]        |
| Guanarito Virus                       | <i>Guanarito mammarenavirus</i>                                     | <i>Arenaviridae</i> | 1989<br>Venezuela                         | <i>Zygodontomys<br/>brevicauda</i> | [288,289]        |
| Hantavirus                            | <i>Hantaan orthohantavirus</i><br><i>Sin Nombre orthohantavirus</i> | <i>Hantaviridae</i> | 1950-1953 Korea<br>1993 Four Corners, USA | Various<br>rodent spp.             | [290-292]        |
| Junin Virus                           | <i>Argentinian mammarenavirus</i>                                   | <i>Arenaviridae</i> | Recognized ca. 1950<br>Argentina          | <i>Calomys<br/>musculinius</i>     | [243,246]        |
| Lassa Virus                           | <i>Lassa mammarenavirus</i>                                         | <i>Arenaviridae</i> | Recognized ca. 1950<br>West Africa        | <i>Mastomys<br/>natalensis</i>     | [255,293]        |
| Lujo Virus                            | <i>Lujo mammarenavirus</i>                                          | <i>Arenaviridae</i> | 2008<br>Zambia and South Africa           | Unknown                            | [294]            |
| Lymphocytic<br>Choriomeningitis Virus | <i>Lymphocytic choriomeningitis<br/>mammarenavirus</i>              | <i>Arenaviridae</i> | Recognized ca. 1933 U.S.A.                | <i>Mus musculus</i>                | [295,296]        |
| Machupo Virus                         | <i>Machupo mammarenavirus</i>                                       | <i>Arenaviridae</i> | 1950s-60s<br>Bolivia                      | <i>Calomys callosus</i>            | [297]            |
| Sabiá Virus                           | <i>Brazilian mammarenavirus</i>                                     | <i>Arenaviridae</i> | 1990<br>Brazil                            | Unknown                            | [298,299]        |

**Supplementary Table S2.** Examples of Outbreaks in Human Populations by RNA Viruses Harbored by Bats

| <b>Virus<br/>Common Name</b> | <b>Virus<br/>Species Name (ICTV)</b>                                  | <b>Family</b>          | <b>Notable outbreaks</b>                             | <b>Reservoir</b>                 | <b>Citations</b>  |
|------------------------------|-----------------------------------------------------------------------|------------------------|------------------------------------------------------|----------------------------------|-------------------|
| Ebola Virus                  | <i>Sudan ebolavirus</i><br><i>Zaire ebolavirus</i>                    | <i>Filoviridae</i>     | 1967, 2014-2016<br>West Africa                       | Fruit bats<br>(proposed)         | [34,37,215]       |
| Hendra Virus                 | <i>Hendra henipavirus</i>                                             | <i>Paramyxoviridae</i> | 1994 - present<br>Australia                          | <i>Pteropus</i> spp.             | [200,201,222,223] |
| Marburg Virus                | <i>Marburg marburgvirus</i>                                           | <i>Filoviridae</i>     | 1967<br>Germany, Serbia                              | <i>Rousettus<br/>aegyptiacus</i> | [209,213]         |
| MERS-CoV                     | <i>Middle East respiratory<br/>syndrome-related coronavirus</i>       | <i>Coronaviridae</i>   | 2012 Middle East, 2015<br>Republic of Korea          | Various bat<br>species           | [203,206,282-287] |
| Nipah Virus                  | <i>Nipah henipavirus</i>                                              | <i>Paramyxoviridae</i> | 1998-1999, Southeast Asia,<br>Sporadic in SE Asia    | <i>Pteropus</i> spp.             | [231,232,234]     |
| Rabies Virus                 | <i>Rabies lyssavirus</i>                                              | <i>Rhabdoviridae</i>   | Recognized since 1930's<br>Africa, Asia and Americas | Various bat<br>species           | [32,192]          |
| SARS-CoV                     | <i>Severe acute respiratory<br/>syndrome-<br/>related coronavirus</i> | <i>Coronaviridae</i>   | 2003-2004<br>~24 countries                           | Various bat<br>species           | [24]              |
| SARS-CoV-2                   | <i>Severe acute respiratory<br/>syndrome<br/>coronavirus 2</i>        | <i>Coronaviridae</i>   | 2019<br>Global pandemic                              | Bats<br>(proposed)               | [14]              |
